# Supplementary material
Source: PubMed Central journal article supplement (PMC6903689)
Supplement: NIHMS1054928-supplement-Supplemental_Figures.pdf [file NIHMS1054928-supplement-Supplemental_Figures.pdf]

# Supplemental Figures

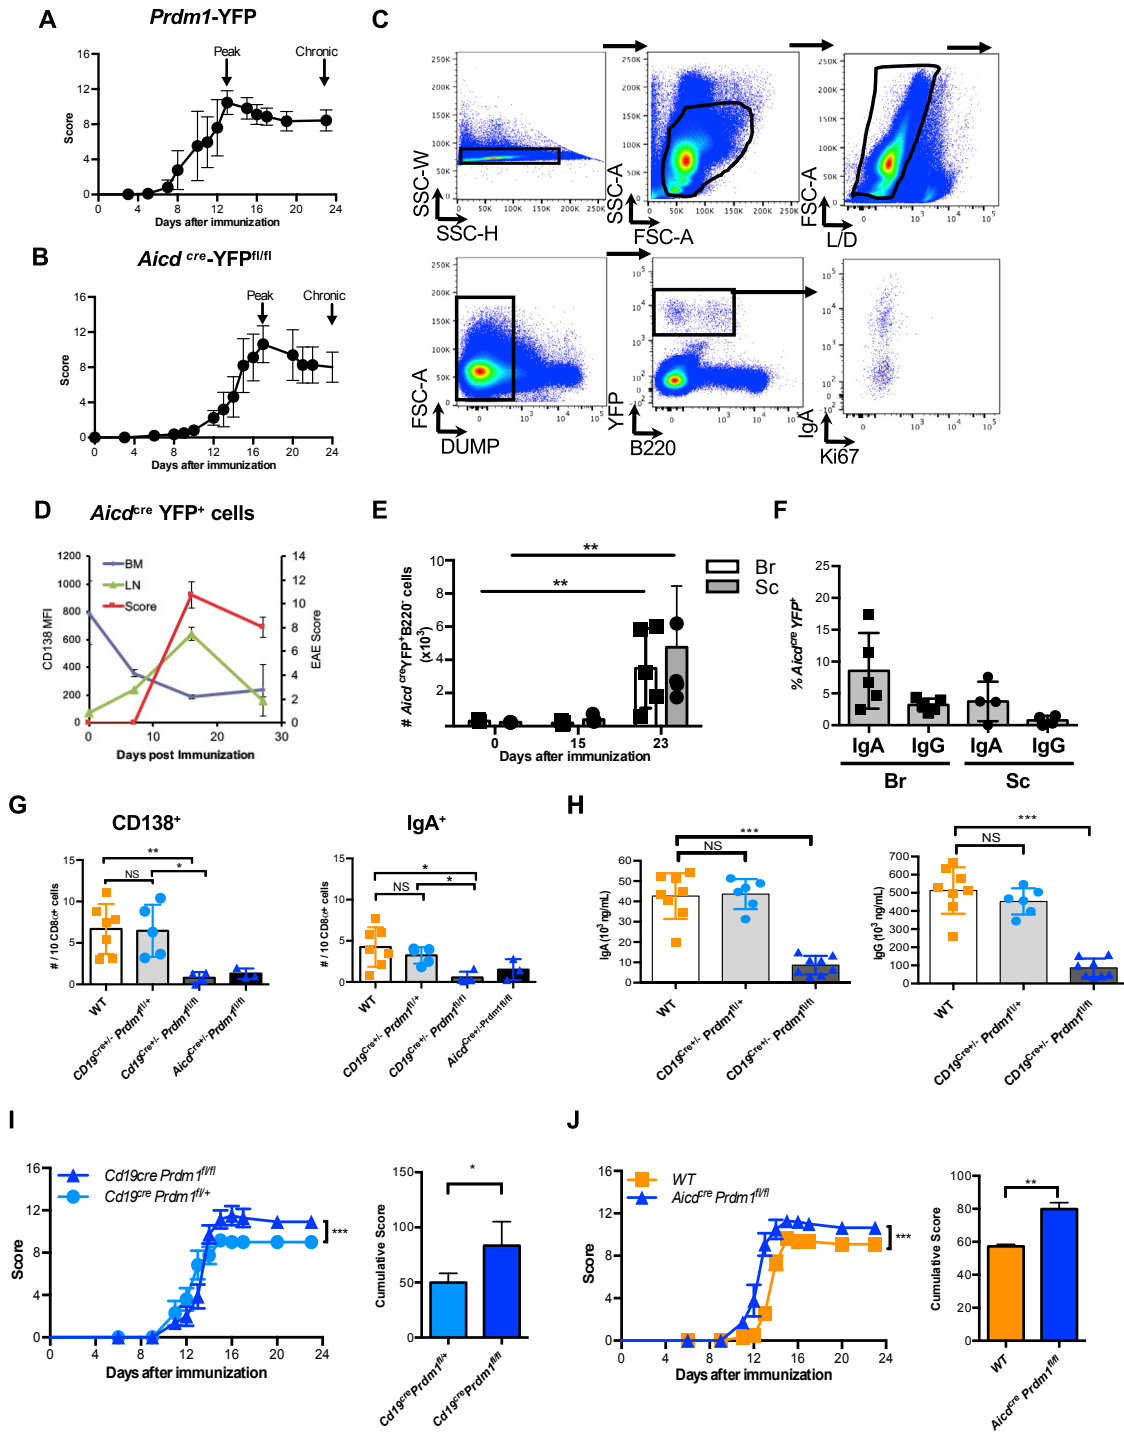

**Figure S1. Quantifying CNS-Resident PB and/or PC and Assessing Their Role in EAE, Related to Figure 1**

(A and B) (A) Clinical course of EAE for *Prdm1*<sup>cre</sup>-YFP<sup>fl/fl</sup> and (B) *Aicd*<sup>cre</sup>-YFP<sup>fl/fl</sup> mice.

(C) Flow cytometry gating strategy used to analyze PB and/or PC (see STAR Methods for details on Dump gate).

(D) Median fluorescence intensity (MFI) of CD138 after gating on YFP<sup>+</sup>B220<sup>int</sup> PB and/or PC cells in BM (blue) and LN (green) during EAE (clinical score depicted in red) in *Aicd*<sup>cre</sup>-YFP<sup>fl/fl</sup> mice.

(E) Absolute numbers of YFP<sup>+</sup>B220<sup>int</sup> PB and/or PC in the Br and Sc of *Aicd*<sup>cre</sup>-YFP<sup>fl/fl</sup> mice at different time points during EAE.

(F) Frequencies of cells expressing IgA or IgG (intracellular) expressed as a percentage of total of YFP<sup>+</sup> cells in both Br and Sc of *Aicd*<sup>cre</sup>-YFP<sup>fl/fl</sup> mice.

(G) Confirmation of PC ablation in *Cd19*<sup>cre</sup>*Prdm1*<sup>fl/fl</sup> mice compared to littermate controls by immunofluorescence microscopy quantification of CD138<sup>+</sup> (left) or IgA<sup>+</sup> PC (right) in the SILP using CD8 $\alpha$  as a normalizing denominator.

(legend continued on next page)

---

(H) Confirmation of PC ablation in *Cd19<sup>cre</sup>Prdm1<sup>fl/fl</sup>* mice compared to littermate controls by measuring levels of IgA (left) or IgG (right) in the serum by ELISA.

(I) EAE clinical scores for *Cd19<sup>cre</sup>Prdm1<sup>fl/fl</sup>* versus *Cd19<sup>cre</sup>Prdm1<sup>fl/+</sup>* littermates.

(J) EAE clinical scores for *Aicd<sup>cre</sup>Prdm1<sup>fl/fl</sup>* versus WT mice.

Experiments (A,B,D,I,J) were repeated 3 times with at least 5 mice per group per experiment. Experiment (E,F) was performed 5 times with 4-5 mice per group per experiment. Experiment (G-H) was repeated twice with 5-8 mice per group per experiment. Experiment (I-J) were performed on 5-6 mice per group. \* =  $p < 0.05$ , \*\* $p < 0.01$ , \*\*\* $p < 0.001$ . Two-way ANOVA Test and Mann Whitney Test. Mean and SEM.

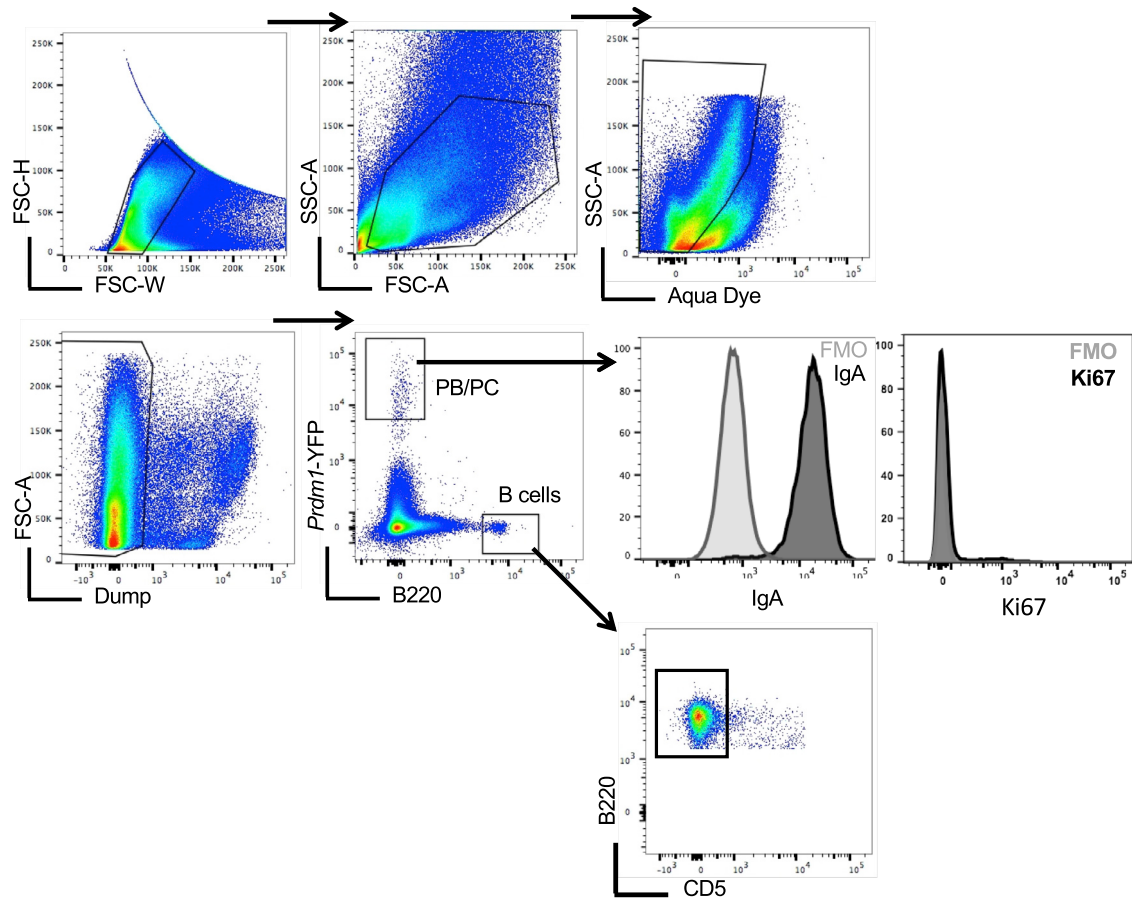

**Figure S2. Post-Sort Analysis of Gut PB and/or PC Prior to Adoptive Transfer, Related to Figure 2**

Gating strategy for sorting gut PC versus gut B cells. Post-sort analysis demonstrated 96%–98% purity with the majority of transferred cells expressing intracellular IgA and staining negative for Ki67 and B220. Please see [STAR Methods](#) for Dump gate.

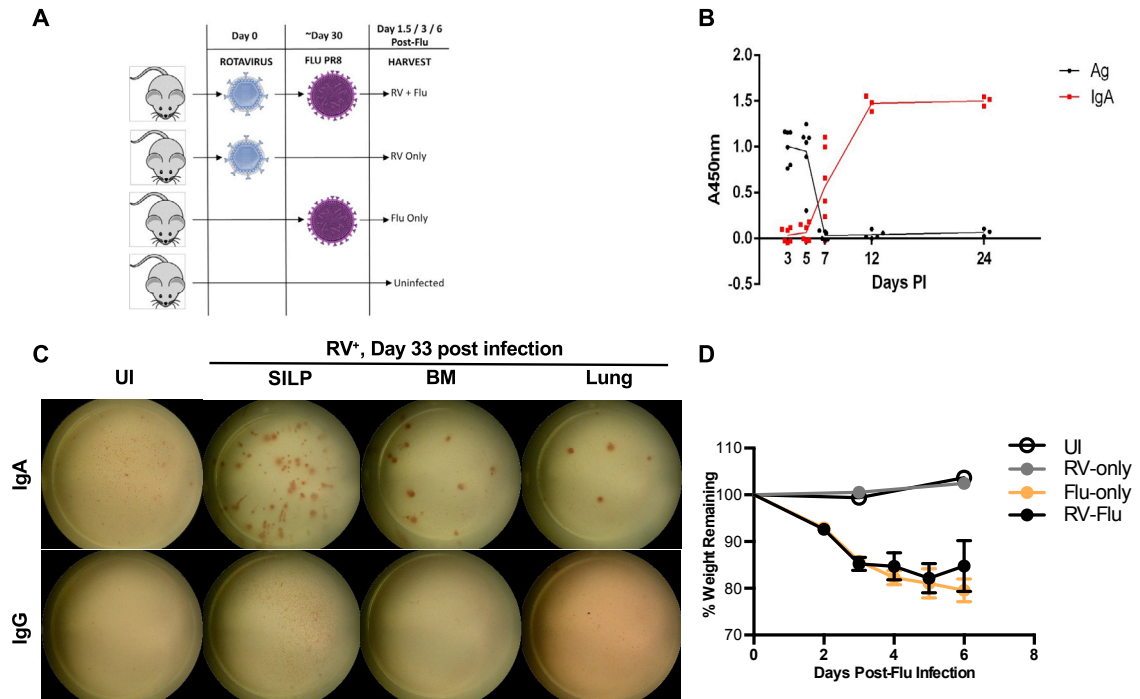

**Figure S3. Using Rotavirus Infection to Track Intestinal B Cells, Related to Figure 3**

(A) Schematic representation of the dual-infection model used for tracking gut-derived PB and/or PC.

(B) RV antigen (Ag) and RV-specific IgA measured by ELISA. A representative infection course is depicted.

(C) Representative RV-specific IgA ASC detected after Flu infection by ELISPOT whereby each spot is counted as one ASC.

(D) Representative disease course (% weight remaining) during flu infection for each of the groups depicted in (A). Day 6 was considered to be the end point as few mice survived beyond day 6. All harvests were performed on or before this time point. Mean and SEM depicted.

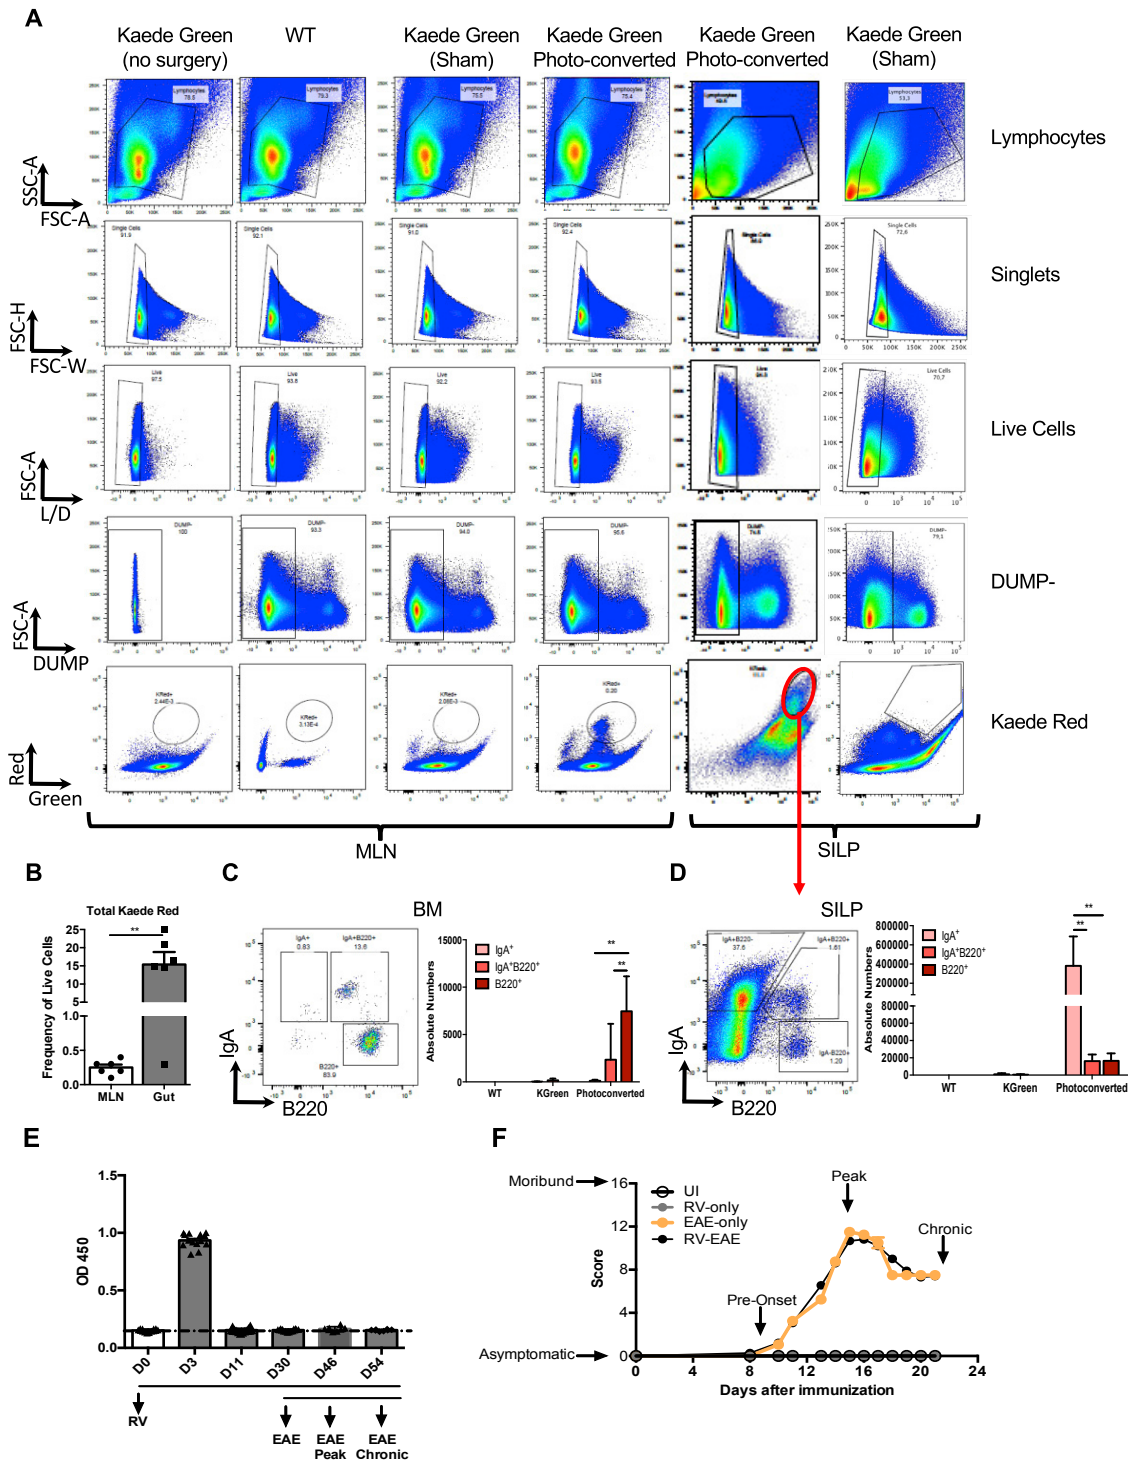

**Figure S4. Using Photo-Conversion of Kaede<sup>+</sup> Cells in the Small Intestine in the Steady State and Rotavirus Infection to Track Mucosal B Cell Trafficking during EAE, Related to Figures 3 and 4**

(A) Gating strategy for negative controls (Kaede-green (non-photoconverted), WT and Sham-surgery mice) and photoconverted Kaede-transgenic mice for quantification of Kaede-Red (K-Red) populations in various tissues (mesenteric LN and SILP are shown), and also the analysis of IgA versus B220 derived from K-Red cells in the gut and BM. Note that gates were established for each individual tissue (due to tissue-specific autofluorescent properties) based on sham surgery controls for K-Red assessment and in the case of IgA/B220 assessment, gates were established for each individual tissue based on FMO controls.

(B) Frequency of photoconverted cells in the K-Red MLN versus SILP.

(legend continued on next page)

---

(C) Absolute numbers of photoconverted cells in the BM.

(D) Absolute numbers of photoconverted cells in the SILP.

(E) RV-Ag ELISA on stool samples post-RV infection at different time points.

(F) Representative clinical scores of mice with MOG<sub>35-55</sub>-induced EAE. UI = uninfected. All experiments were done 3 times with at least 5 mice per group. (Mean and SEM). These experiments were repeated 3 times. Depicted is a single experiment of n = 2 WT, n = 2 non-photoconverted KGreen and n = 6 photoconverted Kaede mice. \* = p < 0.05, \*\*p < 0.01.

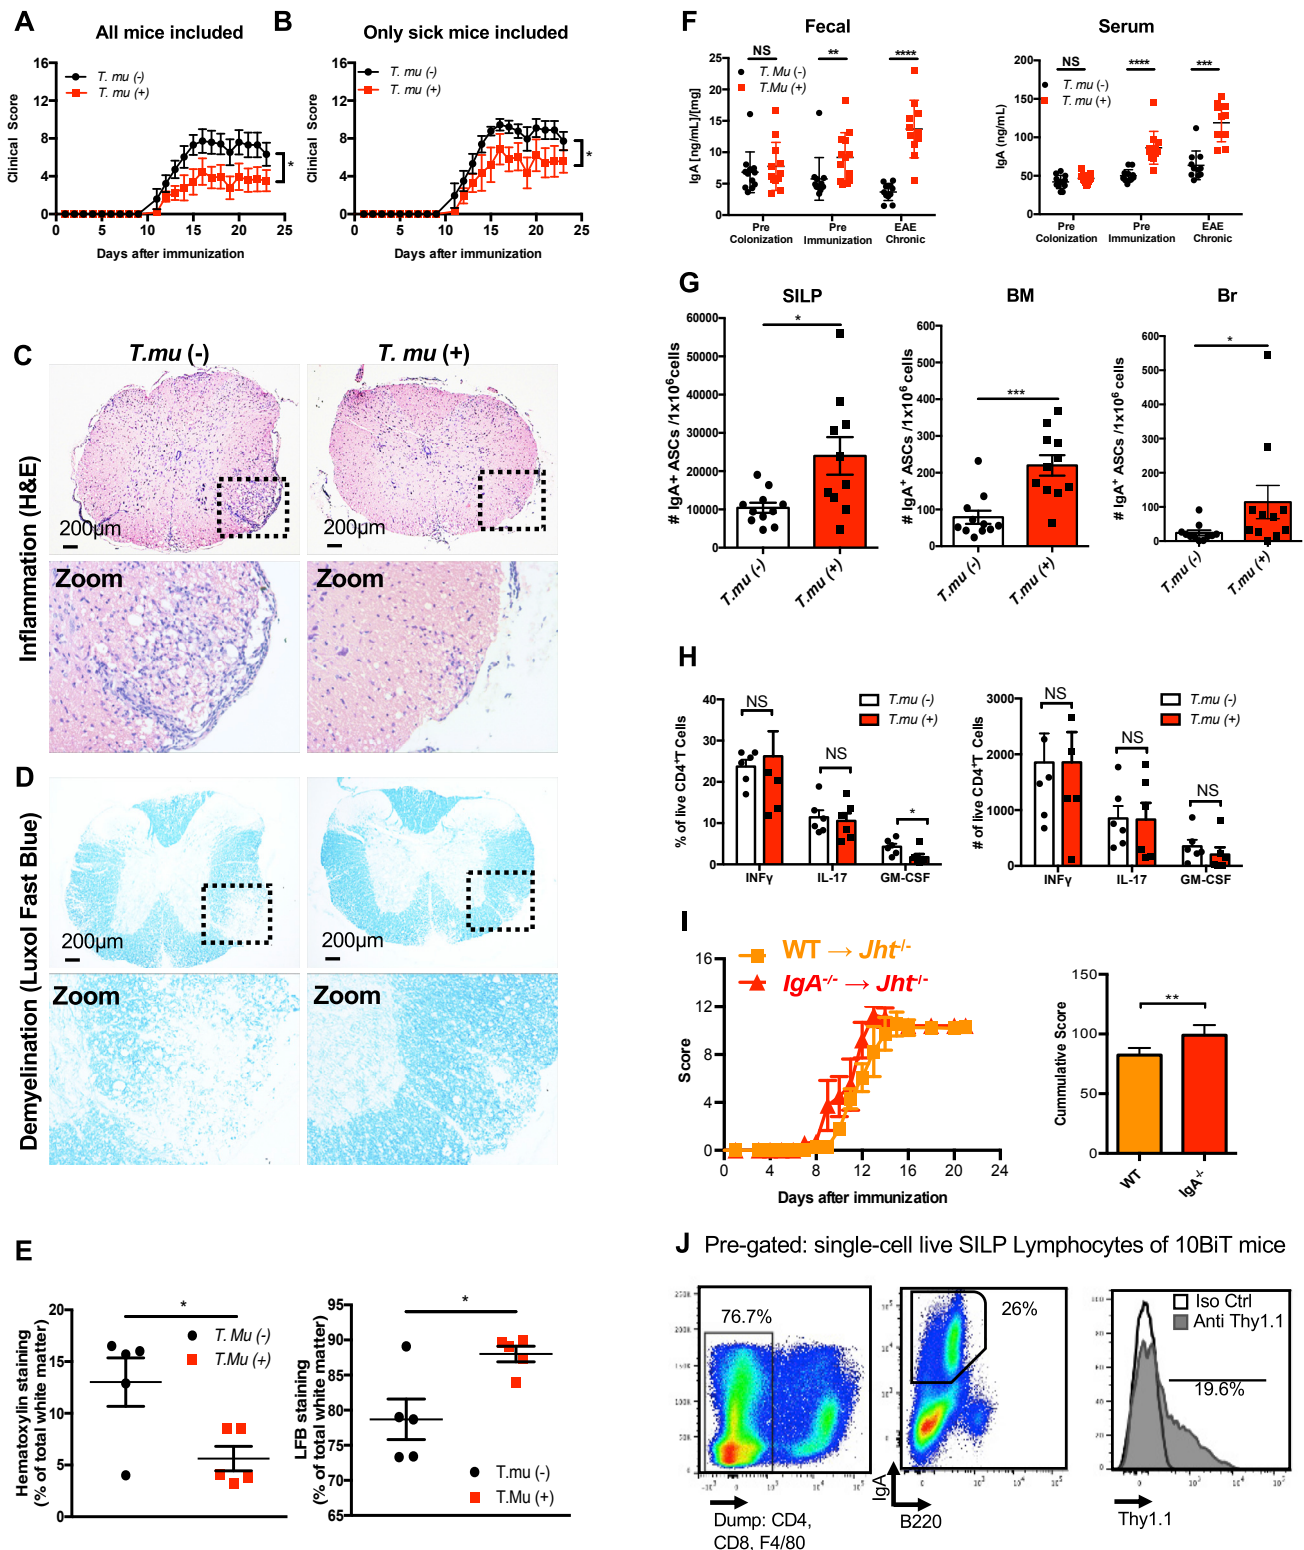

**Figure S5. Colonization with *T.mu* Results in Enhanced IgA<sup>+</sup> ASC Numbers in the CNS Concomitant with Reduced EAE, however, IgA Itself Has a Limited Role in Controlling the Clinical Presentation of EAE, Related to Figure 6**

(A) EAE clinical scores of WT mice colonized or not colonized with *T.mu*. *T.mu*+ mice harbored on average  $140 \times 10^6 \pm 44.9 \times 10^6$  trophozoites per caecum. Incidence was 9/11 for *T.mu*- and 7/11 for *T.mu*+.

(legend continued on next page)

---

(B) EAE clinical scores of same experiment as (A) but only sick mice are depicted, and of the mice that developed disease, average onset was day  $12.4 \pm 1.0$  for *T.mu-* and day  $14. \pm 2.4.$  for *T. Mu+*.

(C and D) Representative images of (C) H&E and (D) LFB staining of Sc from *T.mu (-)* and *T.mu (+)* mice harvested at the chronic phase of the disease.

(E) Quantification of H&E and LFB staining from (C) and (D).

(F) Concentration of IgA in fecal (left) and serum samples (right) collected from experiment (A).

(G) Number of Total IgA-ASC from SILP (left), BM (middle) and Br (right) during the chronic phase of EAE from experiment (A).

(H) Frequency and absolute number of cytokine producing CD4+ T cells from the Sc *T.mu-* versus *T.mu+* mice at the chronic stage of EAE evaluated by flow cytometry.

(I) BM chimeras in which B cell deficient *Jht<sup>-/-</sup>* mice were reconstituted with WT or IgA<sup>-/-</sup> BM and subjected to EAE. Cumulative score is shown on the right.

(J) Representative Flow Cytometry of SILP-resident cells from 10Bit mice. Expression of Thy1.1 (which reports on the expression of *I110* mRNA) is represented as a histogram derived from pre-gating on single cell live SILP lymphocytes from 10Bit mice.

Experiments in (A-H) were done once, n = 10 mice per group for clinical assessment of EAE and IgA measurements, then using n = 5 mice per group for histology and flow cytometry. Experiments in (I-J) were performed twice, n = 4-10 mice per group. \* = p < 0.05, \*\*p < 0.01, \*\*\*p < 0.001, \*\*\*\*p < 0.0001 (Two-way ANOVA Test was performed for (A,B,I); Mann Whitney Test for (E-I). Mean and SEM shown.



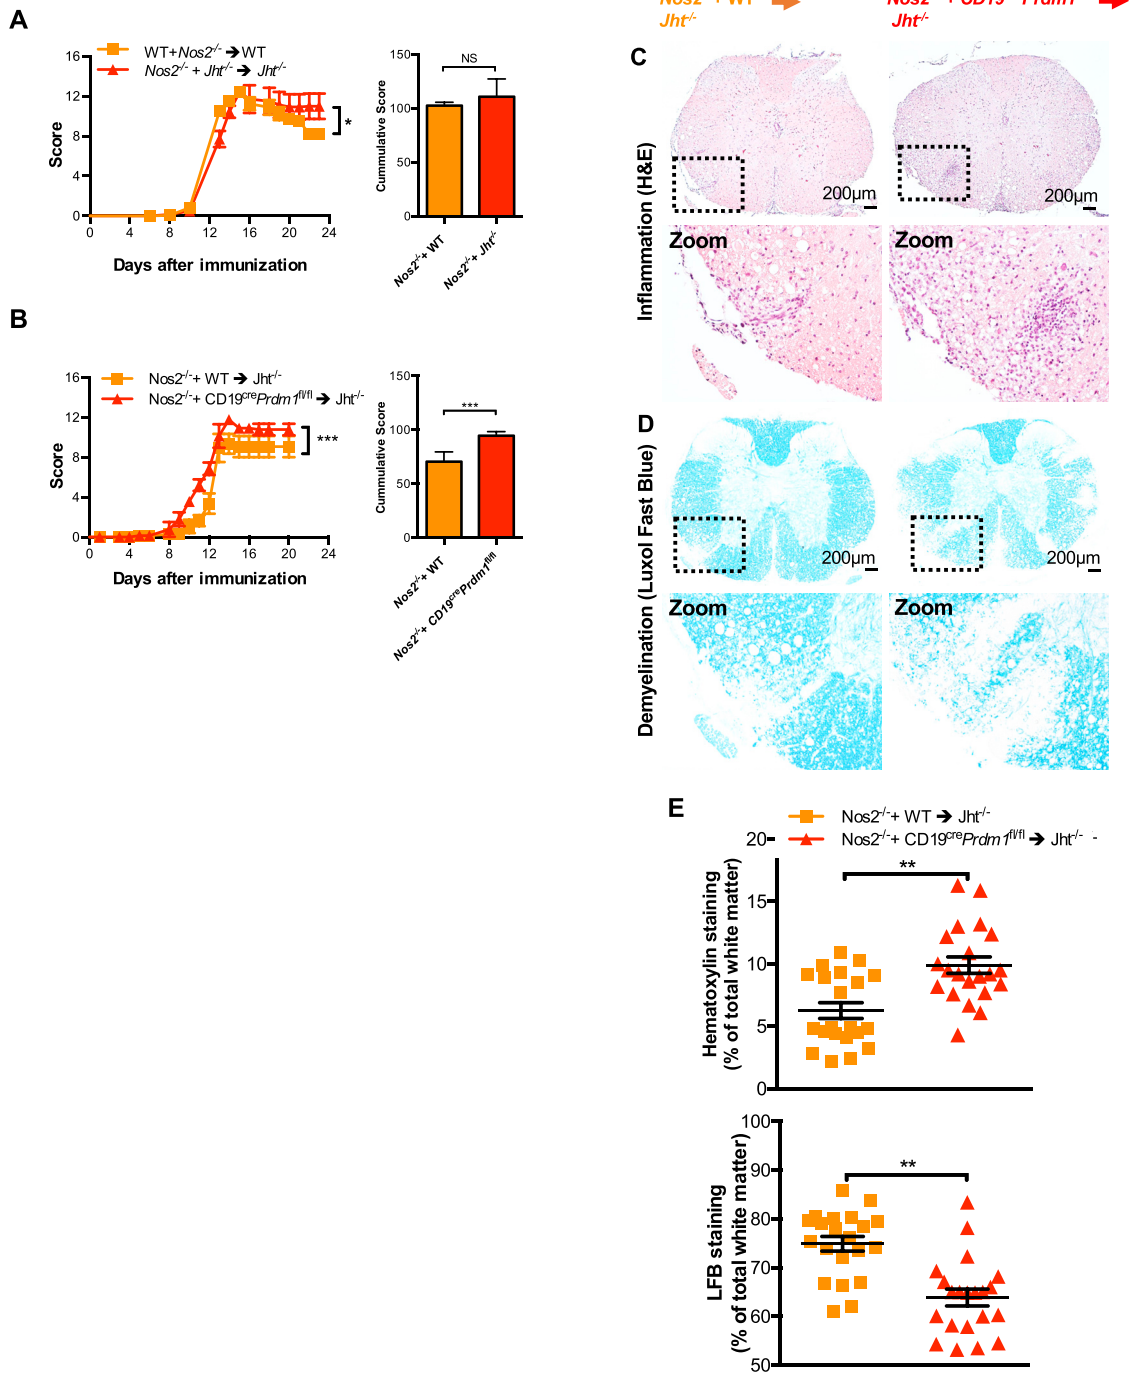

**Figure S6. PB and/or PC-Intrinsic *Nos2* Plays a Secondary Role in Limiting EAE Pathology, Related to Figure 6**

(A) EAE clinical scores of *Nos2*<sup>-/-</sup> + *Jht*<sup>-/-</sup> → *Jht*<sup>-/-</sup> versus *Nos2*<sup>-/-</sup> + WT → *Jht*<sup>-/-</sup> mixed-BM chimeras, or (B) *Nos2*<sup>-/-</sup> + *Cd19*<sup>cre</sup>*Prdm1*<sup>fl/fl</sup> → *Jht*<sup>-/-</sup> versus *Nos2*<sup>-/-</sup> + WT → *Jht*<sup>-/-</sup> mixed-BM chimeras. Cumulative score for (A) and (B) are shown on the right. Representative images of H&E (C) and LFB *Jht*<sup>-/-</sup> (D) are shown. (E) Quantification of H&E staining (Top) and LFB (Bottom) from (C-D) is shown. Experiments in (A) were done 4 times with 6-10 mice per group for each experiment and experiment in (B) was done once with n = 7 mice per group. Two-way ANOVA for (A,B) and Mann Whitney Test for (E). Mean and SEM are shown. \*\* = p < 0.01 or \*\*\* = p < 0.001.

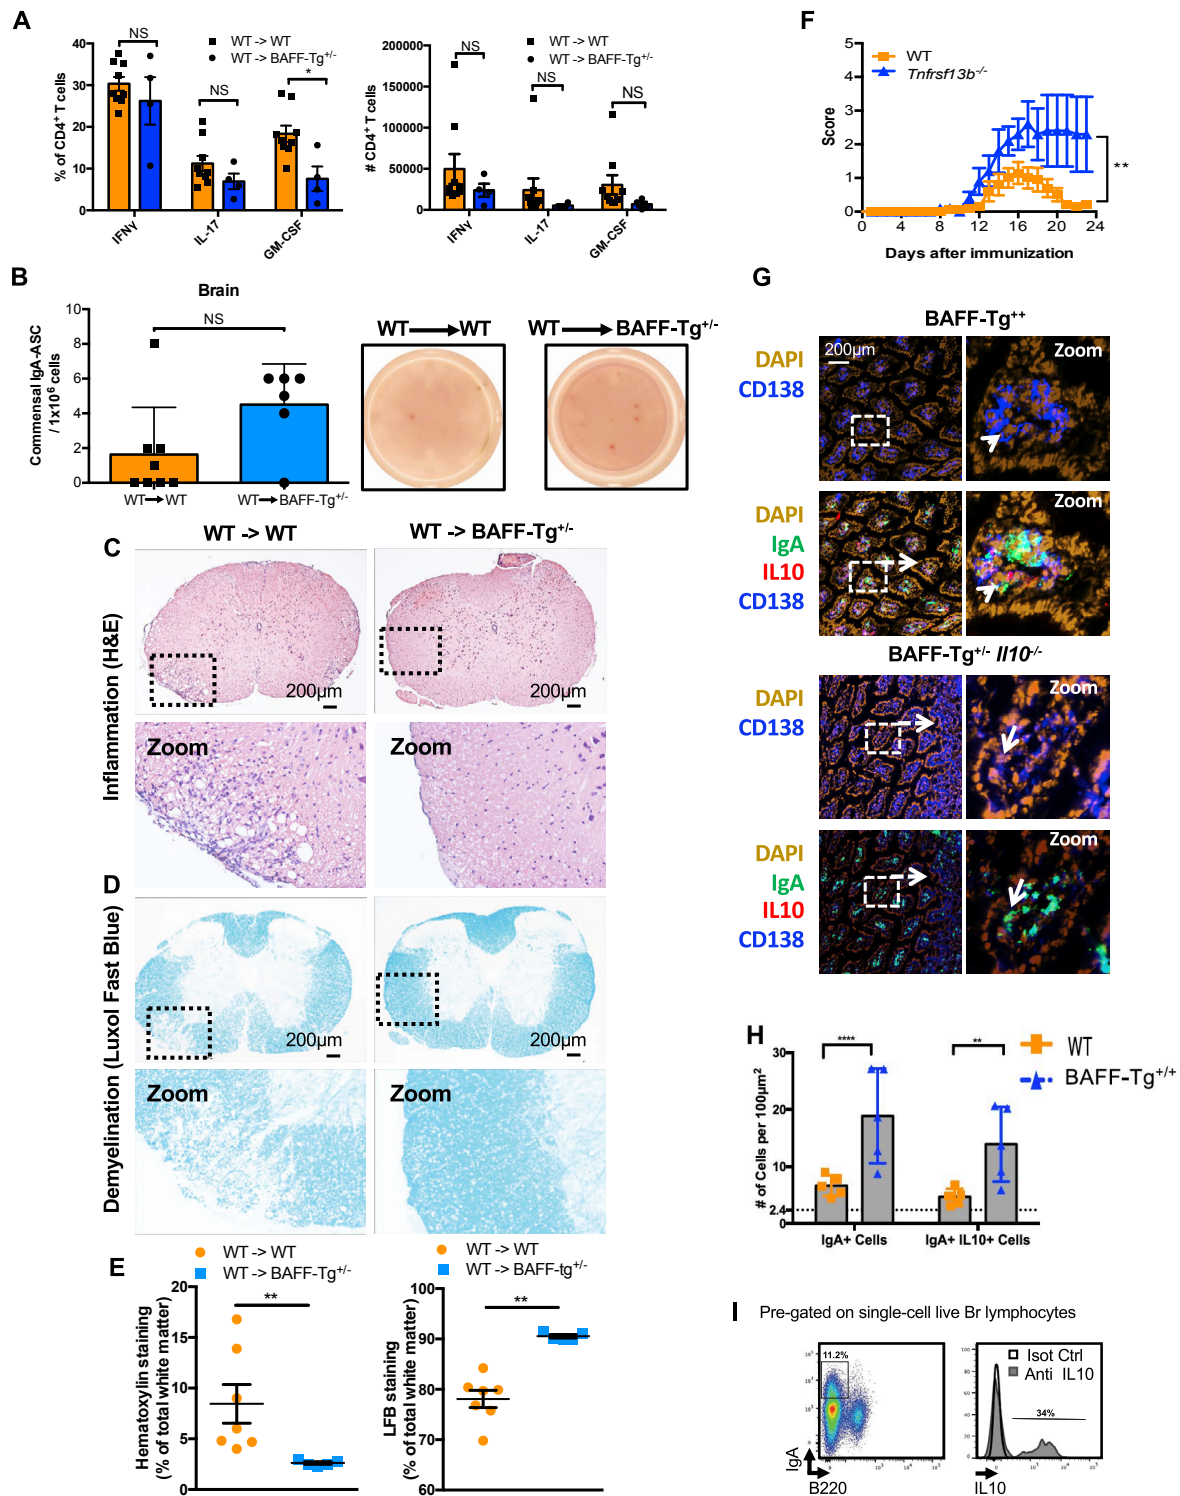

**Figure S7. The Effector Phase of EAE Is Inhibited by Excess BAFF. Related to Figure 7**

(A) Frequency and absolute numbers of cytokine producing CD4<sup>+</sup> T cells from the Sc of WT and BAFF-Tg mice during adoptive transfer EAE was evaluated by flow cytometry. (B) Quantification of commensal-reactive IgA ASC in the Br of WT and BAFF-Tg mice after adoptive transfer EAE (as in A) by ELISPOT. Representative images of (C) H&E and (D) LFB staining from the experiment in (A). (E) Quantification of H&E staining (left) and LFB (right) from (C) and (D). (F) EAE Clinical Scores in WT and *Tnfrsf13b*<sup>-/-</sup> mice that lack TAC1. WT mice are littermate controls derived from backcrosses to C57BL/6 animals at the University of Melbourne. (G) Representative immunofluorescence images of DAPI and CD138 or a merged image of IgA, IL10 and CD138 in small intestinal samples from BAFF-Tg<sup>+/-</sup> and

(legend continued on next page)

---

BAFF-Tg<sup>+/-</sup> x IL10<sup>-/-</sup> mice. Arrows in the Zoomed image of BAFF-Tg<sup>+/+</sup> SILP represent cells that are positive for both IgA and IL10 and arrows in the Zoomed image of BAFF-Tg<sup>+/-</sup> x IL10<sup>-/-</sup> SILP represent cells that are positive only for IgA. (H) Quantification of IgA<sup>+</sup>IL10<sup>+</sup> cells per 100μm<sup>2</sup>, with the dotted line representing the number of IL10<sup>+</sup> cells counted in an IL10<sup>-/-</sup> mouse to show the specificity of the assay. (I) Representative flow cytometry dot plots of intracellular detection of IL10 in IgA<sup>+</sup>B220<sup>+</sup>PB and/or PC in Baff-Tg mice. Experiments in (A-E) were done once, n = 5-6 mice per group. Experiment in (f) was done twice, 5-9 mice per group. Experiments in (G-H) were done once, n = 5 mice per group. Experiment in (I) was done twice, 6 mice per group. \* = p < 0.05, \*\*p < 0.01, \*\*\*p < 0.001 (Two-way ANOVA Test for (F); Mann Whitney Test for (A, B, E, H). Mean and SEM are shown.
