# Supplementary material
Source: PubMed Central journal article supplement (PMC6903689)
Supplement: NIHMS1054928-supplement-Table_S1.pdf [file NIHMS1054928-supplement-Table_S1.pdf]

**Table S1: Summary of most relevant clinical parameters in EAE mice. Related to Figures 1, 2, 6 and 7.**

| Expt type                                  | Strains used                                         | Expt #    | Incidence % (n) | Onset day       | Onset Score | Peak Day          | Peak Score         | Chronic Score           | Mortality (%)           |
|--------------------------------------------|------------------------------------------------------|-----------|-----------------|-----------------|-------------|-------------------|--------------------|-------------------------|-------------------------|
| PB/PC-less mice                            | WT                                                   | 1         | 100 (7/7)       | 12              | 1.6         | 15                | 10.2               | 8                       | 0 (0/7)                 |
|                                            | AID <sup>cre</sup> Blimp <sup>fl/fl</sup>            |           | 100 (6/6)       | 11              | 4.5         | 14                | 12.25 <sup>c</sup> | 10.5 <sup>b</sup>       | 50 (3/6) <sup>c</sup>   |
|                                            | WT                                                   | 2         | 100 (5/5)       | 12              | 4.5         | 16                | 10.2               | 7.3                     | 0 (0/5)                 |
|                                            | AID <sup>cre</sup> Blimp <sup>fl/fl</sup>            |           | 100 (6/6)       | 8 <sup>b</sup>  | 2.7         | 14                | 13 <sup>b</sup>    | 10.5 <sup>b</sup>       | 16.6 (1/6) <sup>c</sup> |
|                                            | WT                                                   | 3         | 100 (8/8)       | 11              | 2.1         | 14                | 8.0                | 7.0                     | 0 (0/8)                 |
|                                            | AID <sup>cre</sup> Blimp <sup>fl/fl</sup>            |           | 100 (9/9)       | 11              | 1.5         | 15                | 11.4 <sup>c</sup>  | 10.2 <sup>b</sup>       | 0 (0/9)                 |
|                                            | CD19 <sup>cre</sup> Blimp <sup>fl/fl</sup>           |           | 100 (8/8)       | 11              | 2.8         | 15                | 12.6 <sup>c</sup>  | 10.0 <sup>b</sup>       | 0 (0/8)                 |
|                                            | WT                                                   | 4         | 100 (6/6)       | 13              | 2.5         | 15                | 9.5                | 9                       | 0 (0/6)                 |
|                                            | AID <sup>cre</sup> Blimp <sup>fl/fl</sup>            |           | 100 (7/7)       | 11 <sup>a</sup> | 1.7         | 15                | 11.3 <sup>c</sup>  | 10.6 <sup>a</sup>       | 14.2 (1/7) <sup>a</sup> |
|                                            | CD19 <sup>cre</sup> Blimp <sup>fl/fl</sup>           |           | 100 (7/7)       | 11 <sup>a</sup> | 1.4         | 16                | 11.5 <sup>c</sup>  | 10.9 <sup>a</sup>       | 14.2 (1/7) <sup>a</sup> |
| WT                                         | 4*                                                   | 100 (6/6) | 13              | 1.2             | 15          | 4                 | 3.7                | 0 (0/6)                 |                         |
| AID <sup>cre</sup> Blimp <sup>fl/fl</sup>  |                                                      | 100 (7/7) | 11 <sup>a</sup> | 1               | 15          | 5.2 <sup>a</sup>  | 4.5 <sup>a</sup>   | 14.2 (1/7) <sup>a</sup> |                         |
| CD19 <sup>cre</sup> Blimp <sup>fl/fl</sup> |                                                      | 100 (7/7) | 12              | 1               | 15          | 5.2 <sup>a</sup>  | 5 <sup>b</sup>     | 14.2 (1/7) <sup>a</sup> |                         |
| PB/PC-less mice + Gut-cell transfer        | CD19 <sup>cre</sup> Blimp <sup>fl/fl</sup> + B cells | 1         | 100 (5/5)       | 10              | 2           | 14                | 13 <sup>b</sup>    | 13 <sup>b</sup>         | 20 (1/5) <sup>a</sup>   |
|                                            | CD19 <sup>cre</sup> Blimp <sup>fl/fl</sup> + PC      |           | 100 (3/3)       | 11              | 1           | 15                | 9.5                | 7.5                     | 0 (0/3)                 |
|                                            | CD19 <sup>cre</sup> Blimp <sup>fl/fl</sup> + B cells | 2         | 100 (5/5)       | 13 <sup>b</sup> | 2           | 12 <sup>a</sup>   | 10.1               | 9.3 <sup>b</sup>        | 20 (1/5) <sup>a</sup>   |
|                                            | CD19 <sup>cre</sup> Blimp <sup>fl/fl</sup> + PC      |           | 100 (5/5)       | 9               | 1.5         | 14                | 9.3                | 7.6                     | 0 (0/5)                 |
|                                            | CD19 <sup>cre</sup> Blimp <sup>fl/fl</sup> + B cells | 3         | 100 (4/4)       | 10              | 2.5         | 14 <sup>a</sup>   | 12.5               | 9.5 <sup>b</sup>        | 0 (0/4)                 |
|                                            | CD19 <sup>cre</sup> Blimp <sup>fl/fl</sup> + PC      |           | 100 (3/3)       | 11              | 1           | 16                | 9.0                | 7.5                     | 0 (0/3)                 |
|                                            | CD19 <sup>cre</sup> Blimp <sup>fl/fl</sup> + B cells | 3*        | 100 (4/4)       | 11              | 1           | 15                | 5.1                | 5.2 <sup>b</sup>        | 0 (0/4)                 |
|                                            | CD19 <sup>cre</sup> Blimp <sup>fl/fl</sup> + PC      |           | 100 (3/3)       | 11              | 1           | 15                | 4.2                | 4                       | 0 (0/3)                 |
| Jht <sup>-/-</sup> + PBS                   | 1                                                    | 100 (4/4) | 11              | 1.5             | 15          | 12.5 <sup>b</sup> | 10.5 <sup>b</sup>  | 25 (1/4) <sup>a</sup>   |                         |
| Jht <sup>-/-</sup> + PC                    |                                                      | 100 (3/3) | 11              | 1.5             | 15          | 8.5               | 8                  | 0 (0/3)                 |                         |
| Jht <sup>-/-</sup> + PBS                   | 2                                                    | 100 (4/4) | 10              | 1.5             | 14          | 12 <sup>b</sup>   | 8.5 <sup>b</sup>   | 0 (0/3)                 |                         |
| Jht <sup>-/-</sup> + PC                    |                                                      | 100 (3/3) | 10              | 1.0             | 14          | 8                 | 7.0                | 0 (0/3)                 |                         |

Continued on next page

|                                                     |                                                               |           |             |                 |                  |                  |                   |                   |                         |
|-----------------------------------------------------|---------------------------------------------------------------|-----------|-------------|-----------------|------------------|------------------|-------------------|-------------------|-------------------------|
|                                                     | Jht <sup>-/-</sup> + PBS                                      | 3         | 100 (4/4)   | 11              | 1.0              | 15               | 13 <sup>b</sup>   | 11 <sup>b</sup>   | 0 (0/3)                 |
|                                                     | Jht <sup>-/-</sup> + PC                                       |           | 100 (3/3)   | 11              | 1.0              | 15               | 8.0               | 7.5               | 0 (0/3)                 |
|                                                     | Jht <sup>-/-</sup> + PBS                                      | 3*        | 100 (4/4)   | 10              | 1                | 15               | 5.5 <sup>a</sup>  | 5 <sup>a</sup>    | 0 (0/3)                 |
|                                                     | Jht <sup>-/-</sup> + PC                                       |           | 100 (3/3)   | 11              | 1                | 15               | 4.5               | 4                 | 0 (0/3)                 |
| BAFF-Tg mice (+/- IL10)                             | WT                                                            | 1         | 100 (7/7)   | 12              | 1.6              | 14               | 10.6              | 10.8              | 0 (0/7)                 |
|                                                     | BAFF-Tg <sup>+/+</sup>                                        |           | 0 (0/3)     | ND              | 0.5              | ND               | 0.5 <sup>b</sup>  | 0.5 <sup>b</sup>  | 0 (0/3)                 |
|                                                     | BAFF-Tg <sup>+/-</sup>                                        |           | 100 (9/9)   | 12              | 1.2              | 16 <sup>a</sup>  | 4.2 <sup>c</sup>  | 2.9 <sup>c</sup>  | 0 (0/9)                 |
|                                                     | WT                                                            | 2         | 100 (4/4)   | 9               | 1.0              | 13               | 10.3              | 7.8               | 0 (0/4)                 |
|                                                     | BAFF-Tg <sup>+/+</sup>                                        |           | 0 (4/4)     | ND              | ND               | ND               | 0.5 <sup>b</sup>  | 0.5 <sup>b</sup>  | 0 (0/4)                 |
|                                                     | BAFF-Tg <sup>+/-</sup>                                        |           | 100 (9/9)   | 10              | 1.1              | 16 <sup>c</sup>  | 5.1 <sup>c</sup>  | 3.0 <sup>c</sup>  | 0 (0/9)                 |
|                                                     | WT                                                            | 3         | 100 (5/5)   | 11              | 1.1              | 14               | 10.4              | 8.7               | 0 (0/5)                 |
|                                                     | BAFF-Tg <sup>+/+</sup>                                        |           | 0 (7/7)     | ND              | ND               | ND               | 0.5 <sup>b</sup>  | 0.5 <sup>c</sup>  | 0 (0/7)                 |
|                                                     | BAFF-Tg <sup>+/-</sup>                                        |           | 100 (5/5)   | 14 <sup>b</sup> | 1.5              | 16 <sup>a</sup>  | 4.8 <sup>b</sup>  | 2.6 <sup>c</sup>  | 0 (0/5)                 |
|                                                     | WT (Different vivarium) <sup>d</sup>                          | 4         | 100 (11/11) | 10              | 1                | 17               | 3.5               | 3.5               | 0 (0/11)                |
|                                                     | BAFF-Tg <sup>+/+</sup> (Different vivarium) <sup>d</sup>      |           | 100 (9/9)   | 16 <sup>b</sup> | 1                | 17               | 1                 | 1                 | 0 (0/9)                 |
|                                                     | WT                                                            | 1         | 100 (3/3)   | 9               | 1.7              | 14               | 7                 | 5                 | 0 (0/5)                 |
| BAFF-Tg <sup>+/-</sup> x IL10 <sup>-/-</sup>        |                                                               | 100 (3/3) | 8           | 1.2             | 12               | 8.8              | 6.1               | 0 (0/5)           |                         |
| BAFF-Tg <sup>+/-</sup> x IL10 <sup>+/-</sup>        |                                                               | 100 (3/3) | 9           | 1.0             | 14               | 3 <sup>c</sup>   | 3 <sup>c</sup>    | 0 (0/5)           |                         |
| WT                                                  | 2                                                             | 100 (5/5) | 9           | 1.1             | 12               | 8.6              | 6.4               | 0 (0/5)           |                         |
| BAFF-Tg <sup>+/-</sup> x IL10 <sup>-/-</sup>        |                                                               | 100 (5/5) | 8           | 1.2             | 12               | 10.4             | 8.1               | 0 (0/5)           |                         |
| BAFF-Tg <sup>+/-</sup> x IL10 <sup>+/-</sup>        |                                                               | 100 (5/5) | 9           | 1.1             | 14               | 2.5 <sup>c</sup> | 2.5 <sup>c</sup>  | 0 (0/5)           |                         |
| Mice that lack <i>Il10</i> in the PB/PC compartment | WT x IL10 <sup>-/-</sup> → PC <sup>-/-</sup>                  | 1         | 100 (4/4)   | 11              | 1.5              | 16               | 14.2              | nd                | 0 (0/4)                 |
|                                                     | IL10 <sup>-/-</sup> x PC <sup>-/-</sup> → PC <sup>-/-</sup>   |           | 100 (10/10) | 11              | 1.7              | 16               | 11.8 <sup>b</sup> | nd                | 20 (2/10) <sup>a</sup>  |
|                                                     | WT x IL10 <sup>-/-</sup> → PC <sup>-/-</sup>                  | 2         | 100 (4/4)   | 11              | 1.6              | 15               | 10                | nd                | 0 (0/4)                 |
|                                                     | IL10 <sup>-/-</sup> x PC <sup>-/-</sup> → PC <sup>-/-</sup>   |           | 100 (6/6)   | 11              | 1.7              | 15               | 11.8              | nd                | 16.6(1/6) <sup>a</sup>  |
| IgA-deficient mice                                  | WT → Jht <sup>-/-</sup>                                       | 1         | 100 (8/8)   | 10              | 1.7 <sup>c</sup> | 15               | 10.6              | 10                | 0 (0/8)                 |
|                                                     | IgA <sup>-/-</sup> → Jht <sup>-/-</sup>                       |           | 100 (12/12) | 9               | 3.7 <sup>c</sup> | 13 <sup>a</sup>  | 11.29             | 10.6              | 0 (0/12)                |
|                                                     | WT → Jht <sup>-/-</sup>                                       | 2         | 100 (6/6)   | 11              | 1.6 <sup>a</sup> | 15               | 9.8               | 8.6               | 0 (0/6)                 |
|                                                     | IgA <sup>-/-</sup> → Jht <sup>-/-</sup>                       |           | 100 (11/11) | 10              | 2.0 <sup>a</sup> | 13 <sup>a</sup>  | 9.4               | 9.0               | 0(0/11)                 |
| Mice that lack <i>Nos2</i> in                       | WT x Jht <sup>-/-</sup> → Jht <sup>-/-</sup>                  | 1         | 100 (7/7)   | 11              | 1.6              | 14               | 13.4              | 8.75              | 14.3 <sup>a</sup> (1/7) |
|                                                     | NOS2 <sup>-/-</sup> x Jht <sup>-/-</sup> → Jht <sup>-/-</sup> |           | 100 (7/7)   | 11              | 1.7              | 14               | 13.7              | 11.6 <sup>c</sup> | 57.1 <sup>a</sup> (4/7) |

Continued on next page

|                                                                                       |                                                                                       |           |             |     |     |                  |                   |                    |                         |
|---------------------------------------------------------------------------------------|---------------------------------------------------------------------------------------|-----------|-------------|-----|-----|------------------|-------------------|--------------------|-------------------------|
| the B cell compartment or the PB/PC compartment                                       | WT x Jht <sup>-/-</sup> → Jht <sup>-/-</sup>                                          | 2         | 100 (7/7)   | 12  | 1.8 | 15               | 10                | 9.07               | 14.3 <sup>a</sup> (1/7) |
|                                                                                       | NOS2 <sup>-/-</sup> x Jht <sup>-/-</sup> → Jht <sup>-/-</sup>                         |           | 100 (10/10) | 12  | 1.2 | 15               | 11.8              | 11.2 <sup>c</sup>  | 30 <sup>a</sup> (4/7)   |
|                                                                                       | WT x NOS2 <sup>-/-</sup> → WT                                                         | 3         | 100 (8/8)   | 11  | 2.7 | 15               | 12.5              | 8.5                | 25 (2/8)                |
|                                                                                       | NOS2 <sup>-/-</sup> → NOS2 <sup>-/-</sup>                                             |           | 100 (6/6)   | 11  | 1.7 | 15               | 14 <sup>c</sup>   | 11.08 <sup>b</sup> | 66.7 (4/6) <sup>b</sup> |
|                                                                                       | NOS2 <sup>-/-</sup> x Jht <sup>-/-</sup> → Jht <sup>-/-</sup>                         |           | 100 (9/9)   | 11  | 1.5 | 15               | 12.6              | 10.2 <sup>b</sup>  | 33.3 (3/9) <sup>a</sup> |
|                                                                                       | WT x Jht <sup>-/-</sup> → WT                                                          |           | 100 (10/10) | 11  | 2.0 | 15               | 13.0              | 8.4                | 10 (1/10)               |
|                                                                                       | WT x Jht <sup>-/-</sup> → Jht <sup>-/-</sup>                                          | 4         | 100 (8/8)   | 11  | 1.1 | 15               | 12.4              | 8.25               | 0 (0/8)                 |
|                                                                                       | NOS2 <sup>-/-</sup> x Jht <sup>-/-</sup> → Jht <sup>-/-</sup>                         |           | 100 (15/15) | 11  | 1.2 | 15               | 12.4              | 11 <sup>c</sup>    | 13.3 (2/15)             |
|                                                                                       | NOS2 <sup>-/-</sup> x WT → Jht <sup>-/-</sup>                                         | 5         | 100 (7/7)   | 10  | 1.1 | 14               | 9.35              | 9                  | 0 (0/7)                 |
|                                                                                       | NOS2 <sup>-/-</sup> x CD19 <sup>cre</sup> Blimp <sup>fl/fl</sup> → Jht <sup>-/-</sup> |           | 100 (7/7)   | 9   | 1.8 | 14               | 11.8 <sup>b</sup> | 10.8 <sup>c</sup>  | 0 (0/7)                 |
| NOS2 <sup>-/-</sup> x WT → Jht <sup>-/-</sup>                                         | 100 (7/7)                                                                             |           | 10          | 1.2 | 14  | 3.8              | 3.6               | 0 (0/7)            |                         |
| NOS2 <sup>-/-</sup> x CD19 <sup>cre</sup> Blimp <sup>fl/fl</sup> → Jht <sup>-/-</sup> | 5*                                                                                    | 100 (7/7) | 9           | 1.0 | 14  | 5.1 <sup>b</sup> | 5.0 <sup>b</sup>  | 0 (0/7)            |                         |

All values indicate mean

<sup>a</sup>p<0.05

<sup>b</sup>p<0.005

<sup>c</sup>p<0.0005

<sup>d</sup>5-point clinical score systems (performed in a different lab)

\*Refers to experiments where the 5-point clinical score system was used in parallel.

ND = No detectable disease

nd= not determined, mice had to be euthanized due to ethical reasons.
