# Supplementary material
Source: PubMed Central journal article supplement (PMC6903689)
Supplement: NIHMS1054928-supplement-Table_S2.pdf [file NIHMS1054928-supplement-Table_S2.pdf]

Table S2.

|                  | Patient ID | Age | Sex | Diagnosis | Treatment | EDSS | Gd+ on MRI |
|------------------|------------|-----|-----|-----------|-----------|------|------------|
| Healthy controls | HC_1       | 56  | M   | HC        | na        | na   | na         |
|                  | HC_2       | 36  | F   | HC        | na        | na   | na         |
|                  | HC_3       | 45  | F   | HC        | na        | na   | na         |
|                  | HC_4       | 38  | M   | HC        | na        | na   | na         |
|                  | HC_5       | 37  | M   | HC        | na        | na   | na         |
|                  | HC_6       | 33  | F   | HC        | na        | na   | na         |
|                  | HC_7       | 22  | M   | HC        | na        | na   | na         |
|                  | HC_8       | 43  | M   | HC        | na        | na   | na         |
|                  | HC_9       | 31  | M   | HC        | na        | na   | na         |
|                  | HC_10      | 39  | M   | HC        | na        | na   | na         |
|                  | HC_11      | 43  | M   | HC        | na        | na   | na         |
|                  | HC_12      | 63  | M   | HC        | na        | na   | na         |
|                  | HC_13      | 39  | M   | HC        | na        | na   | na         |
|                  | HC_14      | 34  | M   | HC        | na        | na   | na         |
|                  | HC_15      | 63  | F   | HC        | na        | na   | na         |
|                  | HC_16      | 64  | M   | HC        | na        | na   | na         |
|                  | HC_17      | 45  | M   | HC        | na        | na   | na         |
|                  | HC_18      | 62  | M   | HC        | na        | na   | na         |
|                  | HC_19      | 51  | M   | HC        | na        | na   | na         |
|                  | HC_20      | 61  | F   | HC        | na        | na   | na         |
|                  | HC_21      | 62  | M   | HC        | na        | na   | na         |
|                  | HC_22      | 44  | M   | HC        | na        | na   | na         |
|                  | HC_23      | 32  | M   | HC        | na        | na   | na         |
|                  | HC_24      | 24  | M   | HC        | na        | na   | na         |
|                  | HC_25      | 30  | F   | HC        | na        | na   | na         |
|                  | HC_26      | 59  | M   | HC        | na        | na   | na         |
|                  | HC_27      | 38  | M   | HC        | na        | na   | na         |
|                  | HC_28      | 34  | M   | HC        | na        | na   | na         |
|                  | HC_29      | 47  | F   | HC        | na        | na   | na         |

Continued on next page

|                                 |                |    |   |      |                 |     |     |
|---------------------------------|----------------|----|---|------|-----------------|-----|-----|
|                                 | HC_30          | 58 | M | HC   | na              | na  | na  |
|                                 | HC_31          | 64 | M | HC   | na              | na  | na  |
|                                 | HC_32          | 29 | M | HC   | na              | na  | na  |
| <b>RRMS<sub>Remission</sub></b> | RRMS_1         | 61 | M | RRMS | Off treatment   | 2.0 | no  |
|                                 | RRMS_2         | 42 | F | RRMS | Treatment naive | 3.0 | no  |
|                                 | RRMS_3         | 39 | F | RRMS | Treatment naive | 1.0 | no  |
|                                 | RRMS_4         | 42 | F | RRMS | Treatment naive | 0.0 | no  |
|                                 | RRMS_5         | 47 | F | RRMS | Treatment naive | 2.0 | no  |
|                                 | RRMS_6         | 59 | M | RRMS | Off treatment   | 3.0 | no  |
|                                 | RRMS_7         | 61 | F | RRMS | Treatment naive | 1.5 | no  |
|                                 | RRMS_8         | 37 | F | RRMS | Treatment naive | 2.0 | no  |
|                                 | RRMS_9         | 31 | F | RRMS | Treatment naive | 0   | no  |
|                                 | RRMS_10        | 51 | M | CIS  | Treatment naive | 1.0 | no  |
|                                 | RRMS_11        | 36 | F | RRMS | Treatment naive | 1.0 | no  |
|                                 | RRMS_12        | 41 | F | RRMS | Treatment naive | 2.0 | no  |
|                                 | RRMS_13        | 31 | F | RRMS | Treatment naive | 1.0 | no  |
|                                 | RRMS_14        | 21 | F | RRMS | Treatment naive | 0   | no  |
|                                 | RRMS_15        | 41 | F | RRMS | Treatment naive | 2.5 | no  |
|                                 | RRMS_16        | 32 | F | RRMS | Treatment naive | 1.5 | no  |
|                                 | RRMS_17        | 31 | F | RRMS | Treatment naive | 2.0 | no  |
|                                 | RRMS_18        | 38 | M | RRMS | Treatment naive | 3.0 | no  |
|                                 | RRMS_19        | 47 | F | RRMS | Treatment naive | 2.0 | no  |
|                                 | RRMS_20        | 31 | F | CIS  | Treatment naive | 2.0 | no  |
|                                 | RRMS_21        | 19 | M | CIS  | Treatment naive | 2.0 | no  |
|                                 | RRMS_22        | 36 | M | RRMS | Treatment naive | 1.5 | no  |
| <b>RRMS<sub>Relapse</sub></b>   | RRMS_relapse_1 | 55 | F | RRMS | Treatment naive | 4.5 | yes |
|                                 | RRMS_relapse_2 | 38 | F | RRMS | Treatment naive | 3.5 | yes |
|                                 | RRMS_relapse_3 | 39 | F | RRMS | Treatment naive | 2.0 | yes |
|                                 | RRMS_relapse_4 | 38 | F | RRMS | Treatment naive | 1.0 | no  |
|                                 | RRMS_relapse_5 | 38 | F | RRMS | Treatment naive | 1.5 | yes |
|                                 | RRMS_relapse_6 | 35 | F | CIS  | Treatment naive | 2.0 | yes |
|                                 | RRMS_relapse_7 | 37 | F | CIS  | Treatment naive | 2.5 | yes |
|                                 | RRMS_relapse_8 | 21 | F | RRMS | Treatment naive | 1.5 | yes |

Continued on next page

---

|                        |    |   |      |                 |     |     |
|------------------------|----|---|------|-----------------|-----|-----|
| <b>RRMS_relapse_9</b>  | 41 | F | RRMS | Treatment naive | 2.0 | yes |
| <b>RRMS_relapse_10</b> | 48 | F | RRMS | Treatment naive | 2.0 | yes |
| <b>RRMS_relapse_11</b> | 39 | F | RRMS | Treatment naive | 3.0 | yes |

---

Abbreviations: CIS=clinically isolated syndrome, EDSS=Expanded Disability Status Scale, F=female, Gd+=gadolinium-enhancing lesion, M=male, na=not applicable, MRI=magnetic resonance imaging, HC=healthy control, RRMS=relapsing-remitting multiple sclerosis
